# Supplementary material for: CLEVER-1 targeting antibody, bexmarilimab, supports HLA-DR expression and alters ex vivo responsiveness to azacitidine and venetoclax in myeloid malignancies
Source: Springer Nature journal article supplement (doi:10.1038/s41598-025-01675-y), 2025-05-14
Supplement: MOESM2 [file 41598_2025_1675_MOESM2_ESM.pdf]

## Supplementary information

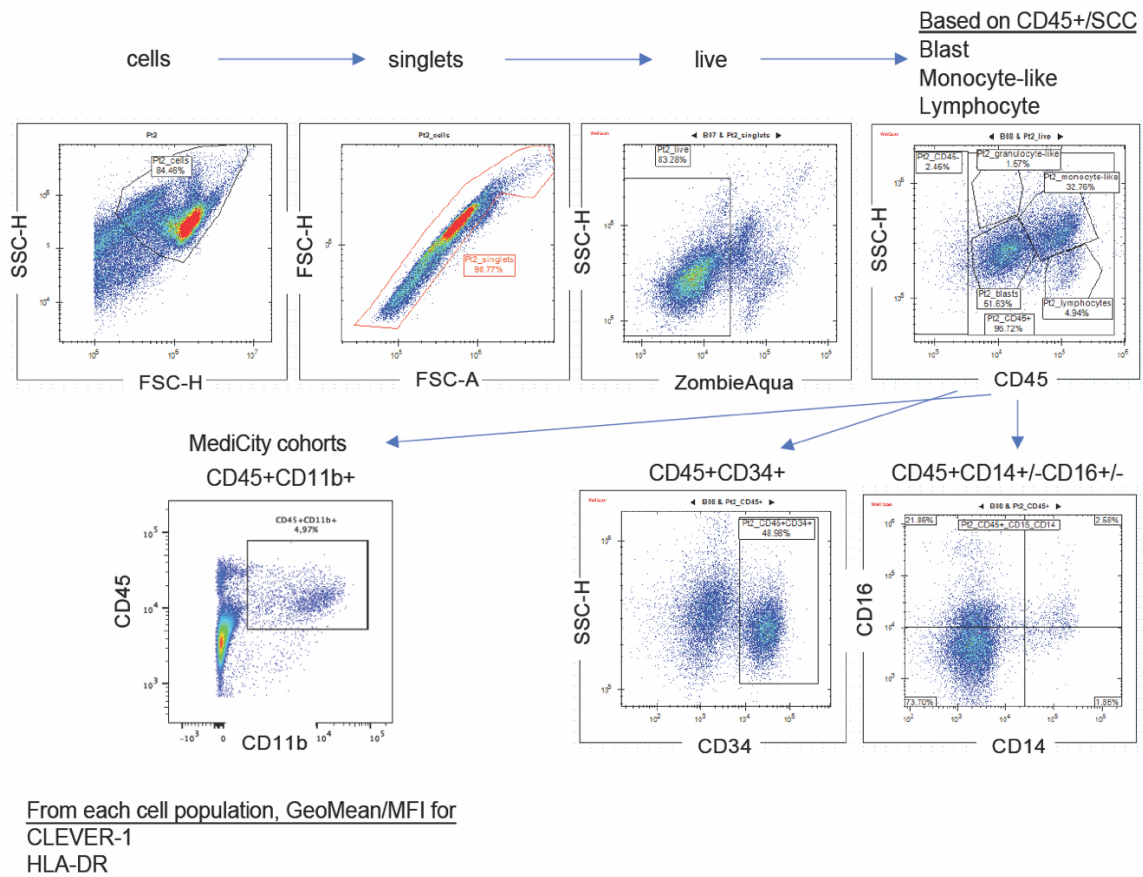

## Supplementary Figure S1. Flow cytometry gating strategies.

Schematic representation of the gating strategy of mononuclear cell populations used for primary AML and MDS sample analyses. Clever-1 and HLA-DR expression as mean or median fluorescence intensity from each population was analyzed.

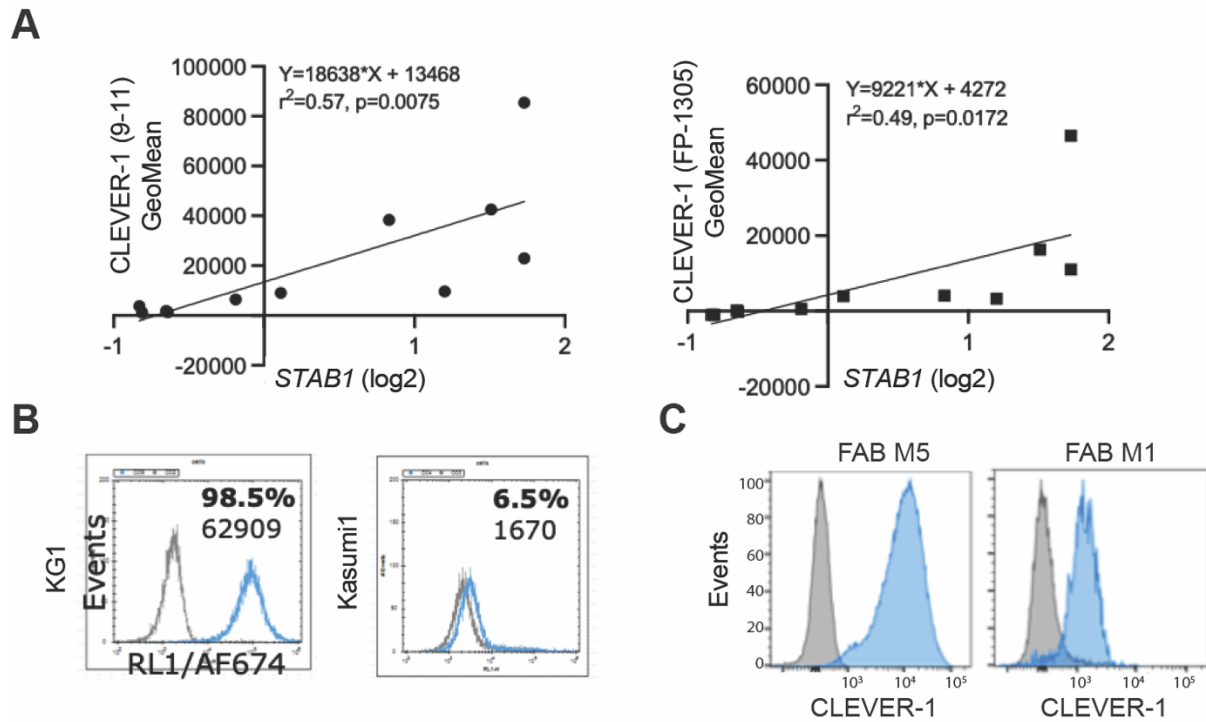

**Supplementary Figure S2. Clever-1 expression in AML.**

**A)** Simple linear regression analysis of *STAB1* RNA (log2) and Clever-1 protein (GeoMean) expression in the studied AML cell lines. **B)** Representative flow cytometry histograms of AML cell lines with high (KG-1) and low (Kasumi1) Clever-1 protein expression. Numbers indicate IgG control normalized % of Clever-1+ cells/live cells and GeoMean of Clever-1. **C)** Flow cytometry histograms showing higher Clever-1 protein expression in monocytic AML (FAB M5) compared to AML with minimal maturation (FAB M1) in two representative patient samples from Medicity cohort 2. Grey=IgG control, Blue=Clever-1 antibody

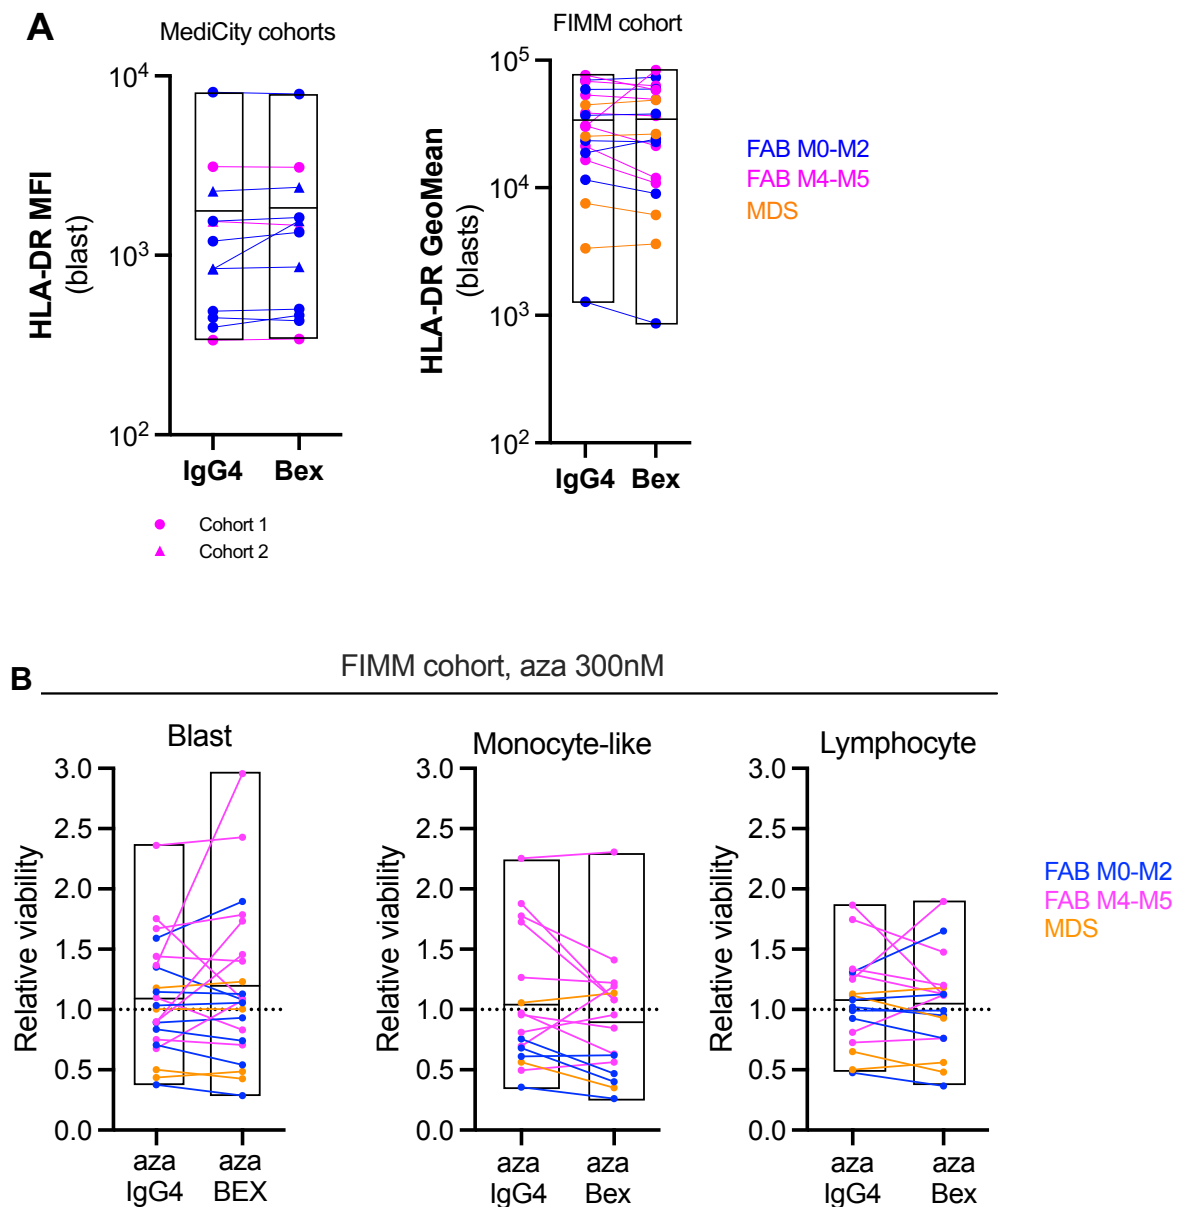

**Supplementary Figure S3. Bexmarilimab effects on AML cells.**

**A)** Expression of HLA-DR in blasts after 48h IgG4 or bexmarilimab treatment in all three cohorts (MediCity 1 and 2, FIMM). The results from one sample are connected by a line and boxplots show treatment group mean (min, max). Bex=bexmarilimab (50 ug/mL). Samples are labeled with color according to FAB subtype and MediCity cohort 1 and 2 samples marked by different shapes. **B)** Relative viability (normalized to IgG4) of primary bone marrow cell

populations after 48h azacitidine (aza; 300nM) plus IgG4 or bexmarilimab (Bex) treatment, in FIMM cohort samples. Samples are labeled with colour according to FAB subtype/disease, results from one sample are connected by a line and boxplots show mean (min/max) per treatment group. Dashed line represents IgG4 control. Only cell populations with enough cells were included in the analysis (5% of parent population or >100 events in IgG4-treated at 48h).

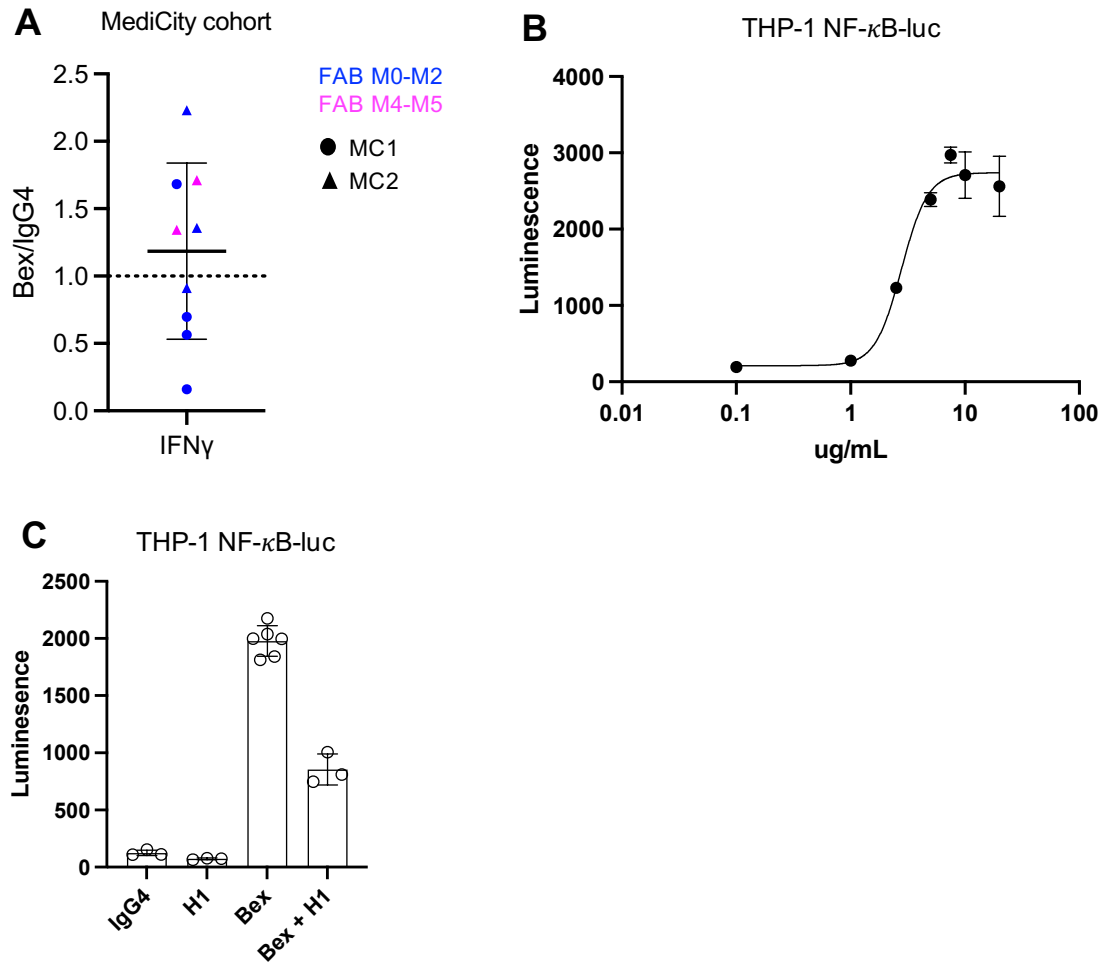

**Supplementary Figure 4. Bexmarilimab effect on IFN $\gamma$  and NF- $\kappa$ B signaling in AML cells.**

**A)** Relative interferon gamma (IFN $\gamma$ ) level in the culture medium of primary AML cells from the MediCity sample cohorts after 48h incubation with bexmarilimab (Bex), measured with Multiplex. Samples are labeled with color according to FAB subtype/disease, mean and sd are indicated. Medicity cohorts' samples (cohort 1/MC1=circle, cohort 2/MC2=triangle). Dashed line represents IgG4 control. **B)** Luminescence signal measured from the THP1-Lucia<sup>TM</sup> NF- $\kappa$ B reporter cell line after bexmarilimab treatment (0.1-20ug/mL). Using sigmoidal 4PL non-linear fit an EC50 value of 2.78  $\mu$ g/mL was obtained. **C)** Luminescence signal after pre-incubation with a recombinant fragment of Clever-1 (H1; 20 ug/mL) and 10 ug/mL bexmarilimab (Bex) or IgG4 control. Error bars in panel B and data points in panel C represent technical replicates (n=3 in panel B).

**Supplementary Table 1. Patient sample characteristics.**

Provided as a separate .xls file

**Supplementary Table 2. Flow cytometry antibody panels.**

| Antigen-fluorochrome  | Manufacturer   | Cat#   | Used at       | Sample cohort          |
|-----------------------|----------------|--------|---------------|------------------------|
| CD45-PerCp-Cy5.5      | BD BioSciences | 564105 | 1:100         | MediCity 1 and 2       |
| CD11b-BV650           | BD BioSciences | 742640 | 1:100         | MediCity 1 and 2       |
| CD14-Pacific Blue     | BD BioSciences | 558121 | 1:100         | MediCity 1 and 2       |
| CD16-BV786            | BD BioSciences | 563690 | 1:100         | MediCity 1 and 2       |
| CD34-PE               | Biolegend      | 343606 | 1:100         | MediCity 1 and 2       |
| HLA-DR FITC           | BD BioSciences | 555558 | 1:100         | MediCity 1             |
| HLA-DR PE-Cy7         | BD BioSciences | 560651 | 1:100         | MediCity 2             |
| CD45-Bv786            | BD BioSciences | 563716 | 1ug/ml        | FIMM                   |
| CD34-PE               | BD BioSciences | 560941 | 0.13ug/ml     | FIMM                   |
| CD16-Bv605            | BD BioSciences | 563172 | 1ug/ml        | FIMM                   |
| CD14-FITC             | BD BioSciences | 345784 | 0.25ug/ml     | FIMM                   |
| HLA-DR-Bv421          | BD BioSciences | 562804 | 0.4ug/ml      | FIMM                   |
| PD-L1-APC             | BioLegend      | 329708 | 2ug/ml        | FIMM                   |
| Clever-1 9-11-AF647   | MediCity       |        | 10ug/ml/1:100 | MediCity 1 and 2, FIMM |
| Clever-1 FP1305-AF647 | MediCity       |        | 20ug/ml/1:100 | MediCity 1 and 2, FIMM |
